# Supplementary material for: Synthesis, computational docking and molecular dynamics studies of a new class of spiroquinoxalinopyrrolidine embedded chromanone hybrids as potent anti-cholinesterase agents
Source: Royal Society of Chemistry journal article supplement (doi:10.1039/d4ra02432j), 2024-01-01
Supplement: d4ra02432j1.pdf [file d4ra02432j1.pdf]

## Synthesis, computational docking and molecular dynamics studies of new class of spiroquinoxalinopyrrolidine embedded chromanone hybrids as potent anti-cholinesterase agents

Natarajan Arumugam<sup>a,\*</sup>, Datta Darshan V M,<sup>b</sup> Vishal Venketesh,<sup>b</sup> Sai Sanwid Pradhan,<sup>b</sup> Anuj Garg,<sup>c</sup> Venketesh Sivaramakrishnan<sup>b</sup>, Subbarao Kanchi,<sup>c</sup> Sakkarapalayam M. Mahalingam<sup>d\*</sup>

<sup>a</sup>Department of Chemistry, College of Science, King Saud University, P.O. Box 2455, Riyadh 11451, Saudi Arabia.

<sup>b</sup>Disease Biology Lab, Department of Biosciences, Sri Sathya Sai Institute of Higher Learning, Prasanthi Nilayam, Andhra Pradesh, India. 515134.

<sup>c</sup>Department of Physics, Sri Sathya Sai Institute of Higher Learning, Prasanthi Nilayam, Andhra Pradesh, India. 515134

<sup>d</sup>Department of Chemistry, 720 Clinic Drive, Purdue University, West Lafayette, Indiana 47907, USA

\*Corresponding Author: [anatarajan@ksu.edu.sa](mailto:anatarajan@ksu.edu.sa) (Natarajan Arumugam); [mahalins@purdue.edu](mailto:mahalins@purdue.edu)

(Sakkarapalayam M. Mahalingam)

---

*5-Benzyl-4-(4-methoxyphenyl)-2-spiro[2.6']indenoquinoxalino-3-spiro[3.3']-chromanonopyrrolidine, 5i*

Obtained as white solid (87%)<sup>1</sup>H NMR (CDCl<sub>3</sub>, 500 MHz):  $\delta_{\text{H}}$  2.87-2.91 (dd,  $J = 14.00, 8.00$  Hz), 3.14-3.17 (dd,  $J = 14.0, 3.0$  Hz), 3.31 (d,  $J = 12.0$  Hz, 1H), 3.78 (s, 3H), 4.62-4.66 (m, 1H), 5.15-5.19 (m, 1H), 6.12 (d,  $J = 8.0$  Hz, ArH, 1H), 6.90-6.92 (m, ArH, 2H), 6.97-7.00 (m, ArH, 1H), 7.10-7.25 (m, ArH, 9H), 7.44-7.46 (m, ArH, 1H), 7.68-7.73 (m, ArH, 3H), 8.07-8.08 (m, ArH, 1H), 8.21-8.23 (m, ArH, 1H); <sup>13</sup>C NMR (CDCl<sub>3</sub>, 125 MHz):  $\delta_{\text{C}}$  39.7, 51.2, 55.3, 61.5, 62.4, 71.9, 114.2, 116.6, 120.8, 121.0, 121.5, 126.4, 127.7, 128.5, 129.2, 129.3, 129.4, 129.6, 131.0, 135.1, 136.7, 138.8, 140.7, 142.2, 147.0, 153.8, 159.0, 160.2, 165.2, 192.8. Mass:  $m/z$  601 (M<sup>+</sup>). Anal. Calcd. For C<sub>40</sub>H<sub>31</sub>N<sub>3</sub>O<sub>3</sub>: C, 79.85; H, 5.19; N, 6.98 %; Found: C, 79.97; H, 5.30; N, 7.05%.

*5-Benzyl-4-(phenyl)-2-spiro[2.6']indenoquinoxalino-3-spiro[3.3']-chromanonopyrrolidine, 5a*

Obtained as white solid (90%): <sup>1</sup>H NMR (CDCl<sub>3</sub>, 500 MHz):  $\delta$ /ppm 2.89-2.94 (dd,  $J = 13.5, 8.5$  Hz, 1H), 3.15-3.19 (dd,  $J = 13.5, 2.5$  Hz, 1H), 3.30 (d,  $J = 12.0$  Hz, 1H), 4.66-4.71 (m, 2H),

5.24-5.28 (m, 1H), 6.15 (d,  $J = 10.5$  Hz, 1H), 6.63 (t,  $J = 7.5$  Hz, 1H), 7.01 (t,  $J = 7.0$  Hz, 1H), 7.12-7.29 (m, 10H, ArH), 7.37-7.39 (m, 2H, ArH), 7.47 (d,  $J = 8.0$  Hz, 1H, ArH), 7.71-7.76 (m, 4H, ArH), 8.09-8.11 (m, 1H, ArH), 8.23-8.25 (m, 1H, ArH);  $^{13}\text{C}$  NMR ( $\text{CDCl}_3$ , 125 MHz):  $\delta/\text{ppm}$  39.7, 51.9, 61.7, 62.2, 71.8, 71.9, 116.6, 120.8, 120.9, 121.5, 126.4, 126.6, 127.5, 127.7, 128.5, 128.8, 129.2, 129.3, 129.4, 129.6, 129.9, 131.1, 135.2, 136.4, 136.8, 138.7, 140.8, 142.2, 146.9, 153.8, 160.2, 165.1, 192.7. Mass  $m/z$ : 571 ( $\text{M}^+$ ); Anal. Calcd for  $\text{C}_{39}\text{H}_{29}\text{N}_3\text{O}_2$ : C, 81.94; H, 5.11; N, 7.35; Found C, 82.02; H, 5.23; N, 7.47%.

*5-Benzyl-4-(4-bromophenyl)-2-spiro[2.6']indenoquinoxalino-3-spiro[3.3']chromanonopyrrolidine, 5b*

Obtained as white solid (88%):  $^1\text{H}$  NMR ( $\text{CDCl}_3$ , 500 MHz):  $\delta/\text{ppm}$  2.90-2.95 (dd,  $J = 14.5, 9.0$  Hz, 1H), 3.11-3.14 (dd,  $J = 13.5, 3.0$  Hz, 1H), 3.30 (d,  $J = 12.5$  Hz, 1H), 4.60 (d,  $J = 12.0$  Hz, 1H), 4.66 (d,  $J = 11.0$  Hz, 1H), 5.17-5.21 (m, 1H), 6.15 (d,  $J = 8.0$  Hz, 1H), 6.65 (t,  $J = 7.5$  Hz, 1H), 7.00-7.04 (m, 1H), 7.12-7.25 (m, 10H, ArH), 7.48-7.51 (m, 3H, ArH), 7.71-7.76 (m, 3H, ArH), 8.09-8.11 (m, 1H, ArH), 8.21-8.23 (m, 1H, ArH);  $^{13}\text{C}$  NMR ( $\text{CDCl}_3$ , 125 MHz):  $\delta/\text{ppm}$  39.9, 51.5, 61.4, 61.5, 71.8, 71.9, 116.7, 120.9, 121.0, 121.5, 121.6, 126.5, 126.6, 127.8, 128.5, 128.9, 129.2, 129.3, 129.4, 129.7, 129.8, 131.0, 131.9, 135.3, 135.6, 136.8, 138.5, 140.6, 142.3, 146.7, 153.8, 160.2, 164.9, 192.6; Mass  $m/z$ : 649 ( $\text{M}^+$ ); Anal. Calcd for  $\text{C}_{39}\text{H}_{28}\text{BrN}_3\text{O}_2$ : C, 72.00; H, 4.34; N, 6.46; Found C, 72.11; H, 4.46; N, 6.54%.

*5-Benzyl-4-(4-methylphenyl)-2-spiro[2.6']indenoquinoxalino-3-spiro[3.3']chromanonopyrrolidine, 5g*

Obtained as white solid (89%):  $^1\text{H}$  NMR ( $\text{CDCl}_3$ , 500 MHz):  $\delta/\text{ppm}$  2.35 (s, 3H), 2.89-2.94 (dd,  $J = 13.5, 8.0$  Hz, 1H, ArH), 3.18-3.21 (m, 1H), 3.33 (d,  $J = 12.5$  Hz, 1H), 4.67 (d,  $J = 4.0$  Hz, Hz, 1H), 4.70 (d,  $J = 6.0$  Hz, 1H), 5.22-5.26 (m, 1H), 6.14 (d,  $J = 8.5$  Hz, 1H), 6.34 (t,  $J = 7.5$  Hz, 1H, ArH), 7.00 (t,  $J = 9.0$  Hz, 1H, ArH), 7.12-7.28 (m, 12H, ArH), 7.48 (d,  $J = 7.5$  Hz, 1H), 7.71-7.76 (m, 3H), 8.09-8.11 (m, 1H), 8.24-8.26 (m, 1H);  $^{13}\text{C}$  NMR ( $\text{CDCl}_3$ , 125 MHz):  $\delta/\text{ppm}$  21.2, 39.7, 51.6, 61.6, 62.2, 71.9, 72.0, 116.6, 120.8, 121.0, 121.5, 126.4, 126.7, 127.7, 128.5, 128.8, 129.2, 129.3, 129.4, 129.6, 129.9, 131.0, 133.3, 135.1, 136.8, 137.1, 138.9, 140.8, 142.2, 147.0, 153.8, 160.2, 165.2, 192.7; Mass  $m/z$ : 605 ( $\text{M}^+$ ); Anal. Calcd for  $\text{C}_{40}\text{H}_{31}\text{N}_3\text{O}_2$ : C, 82.03; H, 5.33; N, 7.17; Found C, 82.12; H, 5.45; N, 7.29%.

*5-Benzyl-4-(3-methoxyphenyl)-2-spiro[2.6']indenoquinoxalino-3-spiro[3.3']-chromanonopyrrolidine, 5h*

Obtained as white solid (85%):  $^1\text{H}$  NMR ( $\text{CDCl}_3$ , 500 MHz):  $\delta/\text{ppm}$  2.90-2.95 (dd,  $J = 14.0, 8.0$  Hz, 1H, ArH), 3.18-3.21 (dd,  $J = 13.5, 2.5$  Hz, 1H), 3.35 (d,  $J = 12.0$  Hz, 1H), 3.86 (s, 3H), 4.67-4.72 (m, 1H), 5.22-5.27 (m, 1H), 6.15 (d,  $J = 8.0$  Hz, 1H, ArH), 6.64 (t,  $J = 8.5$  Hz, 1H), 6.82-6.83 (m, 1H), 6.99-7.03 (m, 1H, ArH), 7.12-7.30 (m, 11H, ArH), 4.48 (d,  $J = 7.0$  Hz, 1H, ArH), 7.71-7.76 (m, 3H, ArH), 8.08-8.10 (m, 1H), 8.22-8.25 (m, 1H, ArH);  $^{13}\text{C}$  NMR ( $\text{CDCl}_3$ , 125 MHz):  $\delta/\text{ppm}$  39.7, 51.9, 55.4, 61.7, 62.3, 71.8, 71.9, 116.7, 120.8, 120.9, 121.6, 126.4, 126.6, 127.8, 128.5, 128.9, 129.1, 129.3, 129.4, 129.6, 129.7, 129.8, 131.0, 135.2, 136.8, 138.1, 138.7, 140.7, 142.2, 146.9, 153.8, 159.9, 160.2, 165.1, 192.7; Mass  $m/z$ : 605 ( $\text{M}^+$ ); Anal. Calcd for  $\text{C}_{40}\text{H}_{31}\text{N}_3\text{O}_3$ : C, 79.85; H, 5.19; N, 6.98; Found C, 79.96; H, 5.31; N, 7.08; %.

*5-Benzyl-4-(3-nitrophenyl)-2-spiro[2.6']indenoquinoxalino-3-spiro[3.3']-chromanonopyrrolidine, 5j*

Obtained as white solid (90%);  $^1\text{H}$  NMR ( $\text{CDCl}_3$ , 500 MHz):  $\delta_{\text{H}}$  3.05-3.06 (m, 2H), 3.23 (d,  $J = 12.5$  Hz), 4.42 (d,  $J = 12.5$  Hz, 1H), 4.81 (d,  $J = 10.0$  Hz, 1H), 5.25-5.29 (m, 1H), 6.16 (d,  $J = 8.0$  Hz, 1H), 6.71 (t,  $J = 7.0$  Hz, 1H, ArH), 7.00-7.24 (m, 11H, ArH), 7.62-7.64 (m, 1H, ArH), 7.74-7.82 (m, 4H, ArH), 8.07-8.11 (m, 3H, ArH);  $^{13}\text{C}$  NMR ( $\text{CDCl}_3$ , 125 MHz):  $\delta_{\text{C}}$  40.6, 52.0, 61.1, 64.1, 67.2, 72.1, 72.5, 116.8, 120.9, 121.2, 121.8, 122.3, 122.4, 123.9, 124.2, 124.8, 126.5, 126.6, 127.9, 128.1, 128.5, 129.1, 129.3, 129.4, 129.5, 129.7, 129.9, 135.5, 136.8, 138.2, 139.4, 140.5, 142.2, 145.8, 148.6, 153.7, 160.3, 164.0, 192.7; Mass:  $m/z$  601 ( $\text{M}^+$ ). Anal. Calcd. For  $\text{C}_{39}\text{H}_{28}\text{N}_4\text{O}_4$ : C, 75.96; H, 4.58; N, 9.09%; Found: C, 76.04; H, 4.71; N, 9.20%.

### **In vitro cholinesterase enzymes inhibitory activity**

The test samples for cholinesterase enzymes inhibitory potential was evaluated using modified Ellman's method as described by Ahmed and Gilani [1-3]. Galantamine was used as positive control. Solutions of test samples and galantamine were prepared in DMSO at an initial concentration of 1 mg/mL (1000 ppm). The concentration of DMSO in final reaction mixture was 1%. At this concentration, DMSO has no inhibitory effect on both acetylcholinesterase and butyrylcholinesterase enzymes. For acetylcholinesterase (AChE) inhibitory assay, 140  $\mu\text{L}$  of 0.1 M sodium phosphate buffer of pH 8 was first added to a 96-wells microplate followed by 20  $\mu\text{L}$

of test samples and 20  $\mu$ L of 0.09 units/mL acetylcholinesterase enzyme. After 15 min. of incubation at 25 °C, 10  $\mu$ L of 10 mM 5,50 -dithiobis-2-nitrobenzoic acid (DTNB) was added into each well followed by 10  $\mu$ L of 14 mM acetylthiocholine iodide. Thirty minutes after the initiation of enzymatic reaction, absorbance of the colored end-product was measured using BioTek Power Wave X 340 Microplate Spectrophotometer at 412 nm. For butyrylcholinesterase (BuChE) inhibitory assay, the same procedure described above was followed, except for the use of enzyme and substrate, instead of which, butyrylcholine esterase from equine serum and S-butrylthiocholine chloride were used. IC<sub>50</sub> value was calculated by standard protocol [4-5] Each test was conducted in triplicate. Absorbance of the test samples was corrected by subtracting the absorbance of their respective blank. Percentage inhibition was calculated using the following formula:

$$\text{Percentage of inhibition} = \frac{\text{Absorbance of control} - \text{Absorbance of Sample}}{\text{Absorbance of control}} \times 100$$

Selectivity for AChE defined as IC<sub>50</sub>(BChE)/IC<sub>50</sub>(AChE).

Selectivity for BChE defined as IC<sub>50</sub>(AChE)/IC<sub>50</sub>(BChE).

## References

1. T. Ahmed, A.H. Gilani. Inhibitory effect of curcuminoids on acetylcholinesterase activity and attenuation of scopolamine-induced amnesia may explain medicinal use of turmeric in Alzheimer's disease. *Pharmacol Biochem Behav.* 2009, 91(4):554-9..
2. Y. kia, H. Osman, R.Suresh Kumar, A. Basiri, V. Murugaiyah *Bioorg. Med. Chem.* 2014, 22, 1318-1328
3. A. Basiri, B. M. Abd Razik, M. Oday Ezzat, Y. Kia, R. Suresh Kumar, A. I. Almansour, N. Arumugam, V. Murugaiyah, *Bioorg. Chem.* 2017, 75, 210–216
4. B.M. Abd Razik, H. Osman, A. Basiri, A. Salhin, Y. Kia, M.O. Ezzat, V. Murugaiyah. Ionic liquid mediated synthesis and molecular docking study of novel aromatic embedded Schiff bases as potent cholinesterase inhibitors. *Bioorg Chem.* 2014 Dec;57:162-168.
5. A. Basiri, V. Murugaiyah, H. Osman, R.S. Kumar, Y. Kia, K.B. Awang, M.A. Ali. An expedient, ionic liquid mediated multi-component synthesis of novel piperidone grafted cholinesterase enzymes inhibitors and their molecular modeling study. *Eur J Med Chem.* 2013 Sep;67:221-9.

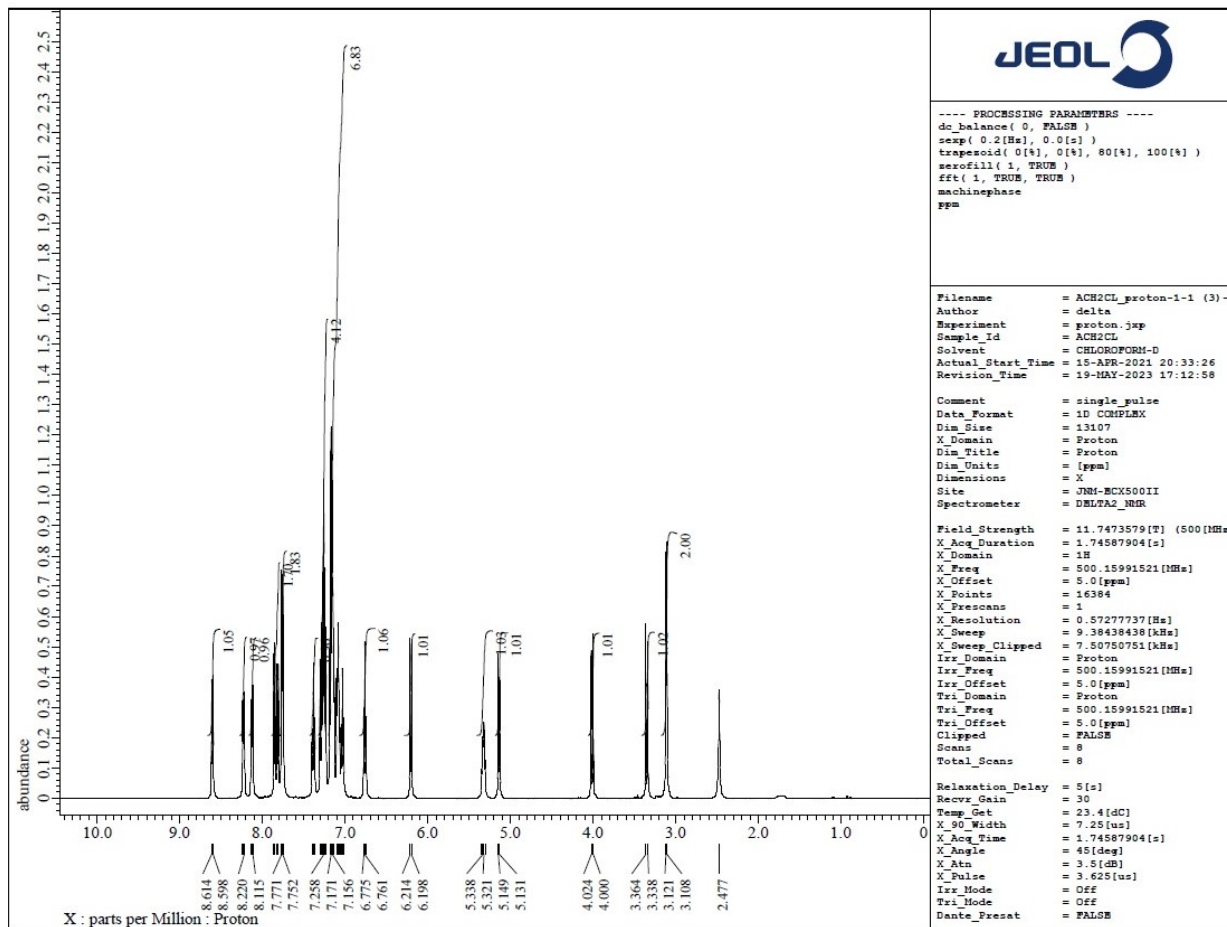

Figure S1. <sup>1</sup>H NMR spectrum of 5c

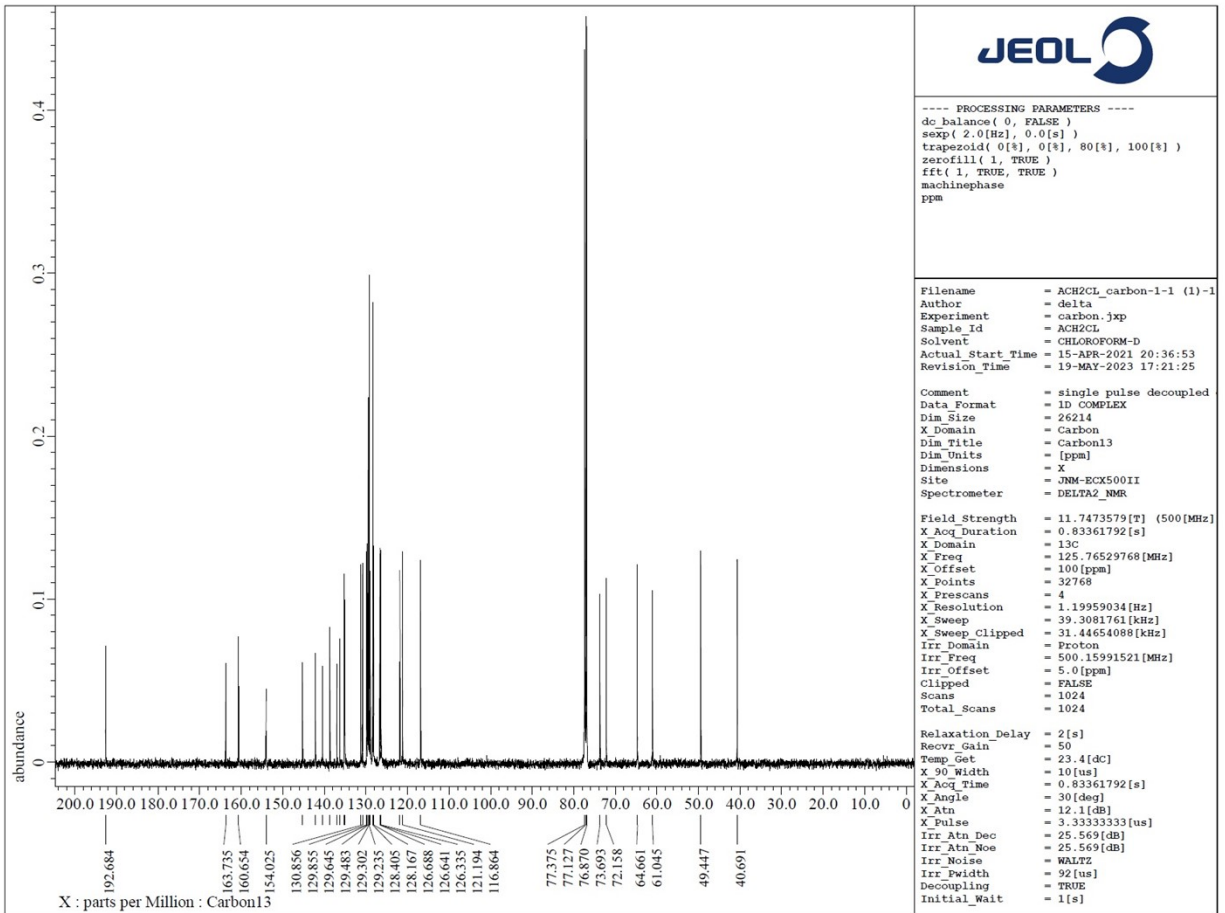

Figure S2.  $^{13}\text{C}$  NMR spectrum of **5c**

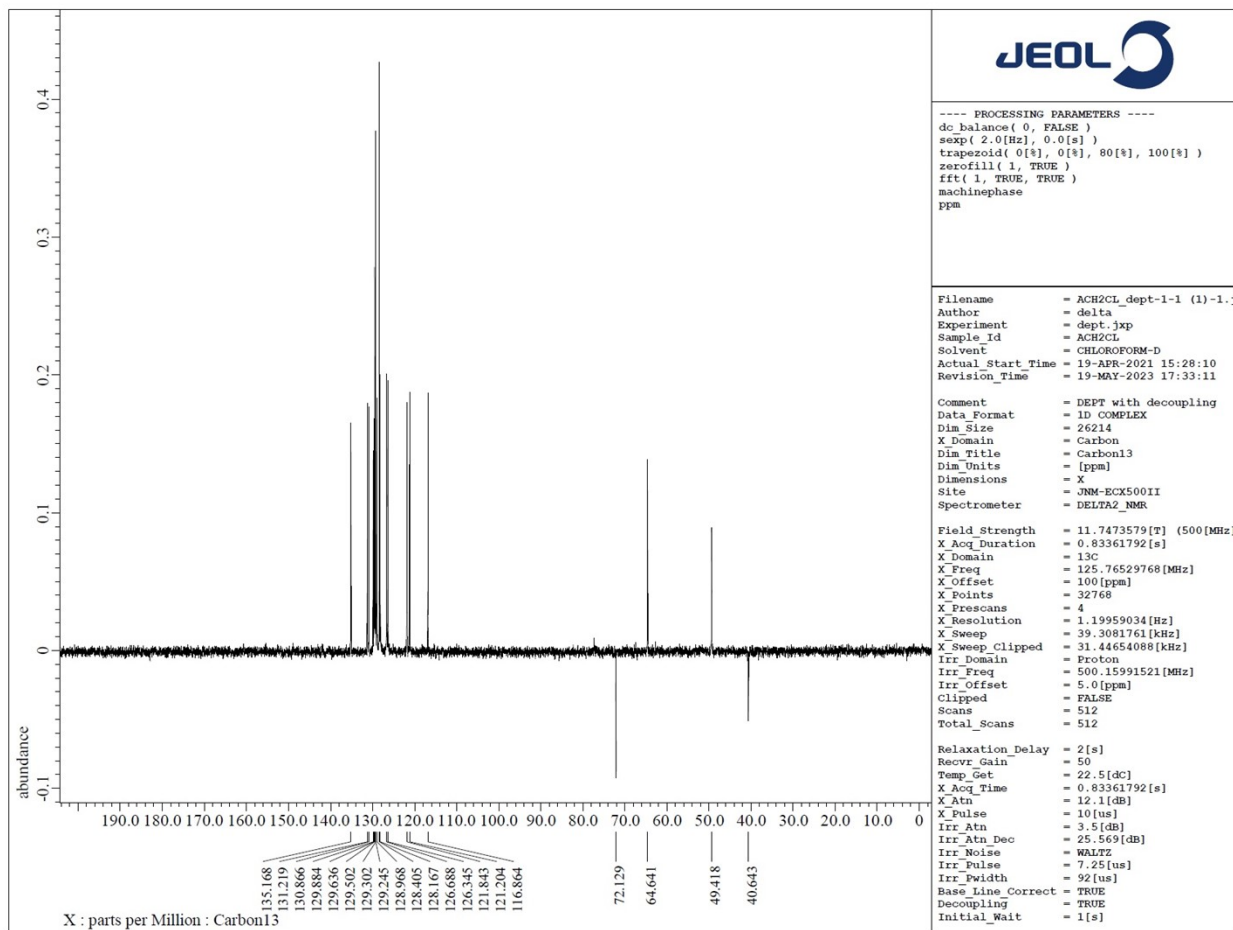

Figure S3. DEPT-135 spectrum of 5c

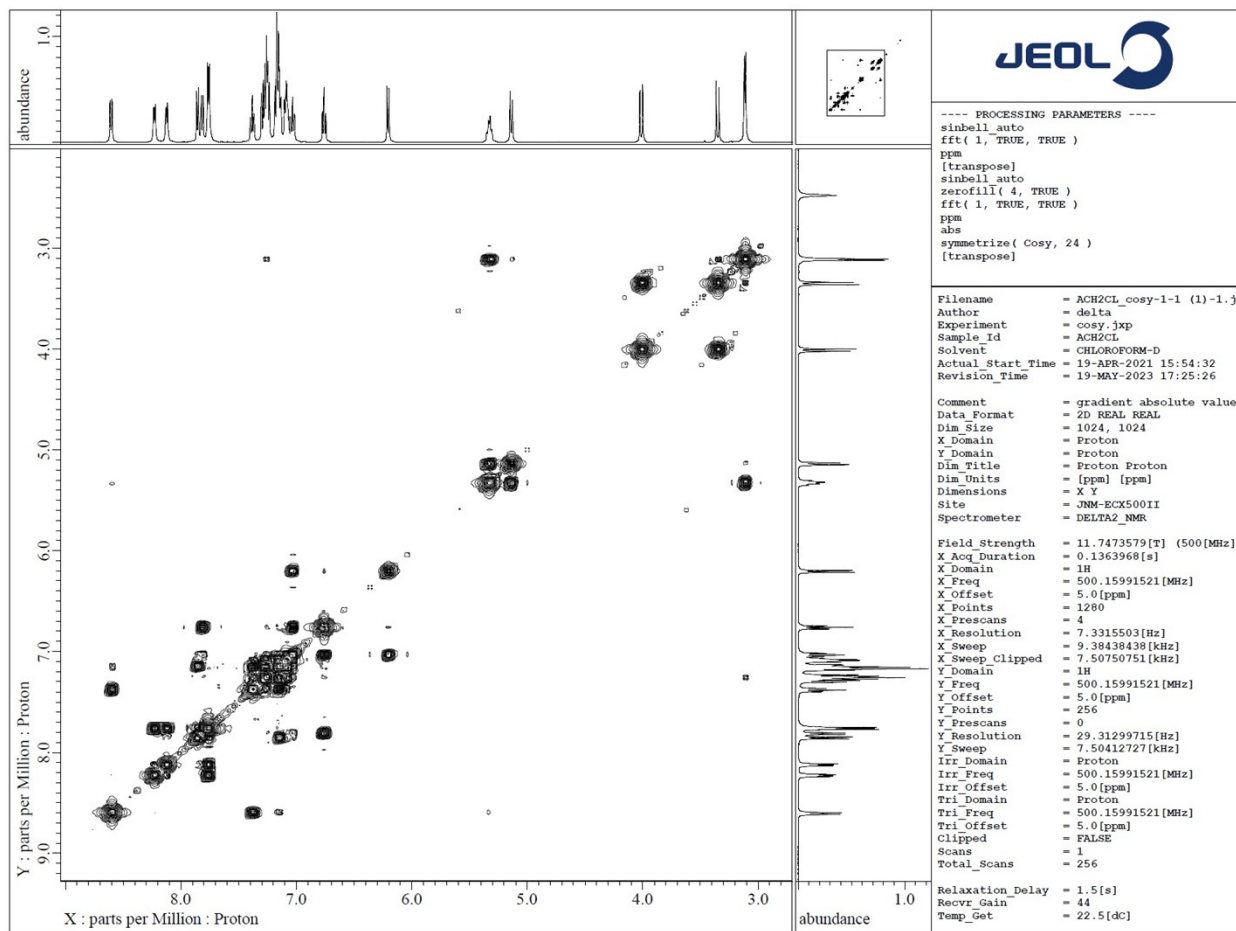

Figure S4.  $^1\text{H}$ ,  $^1\text{H}$ -COSY spectrum of **5c**



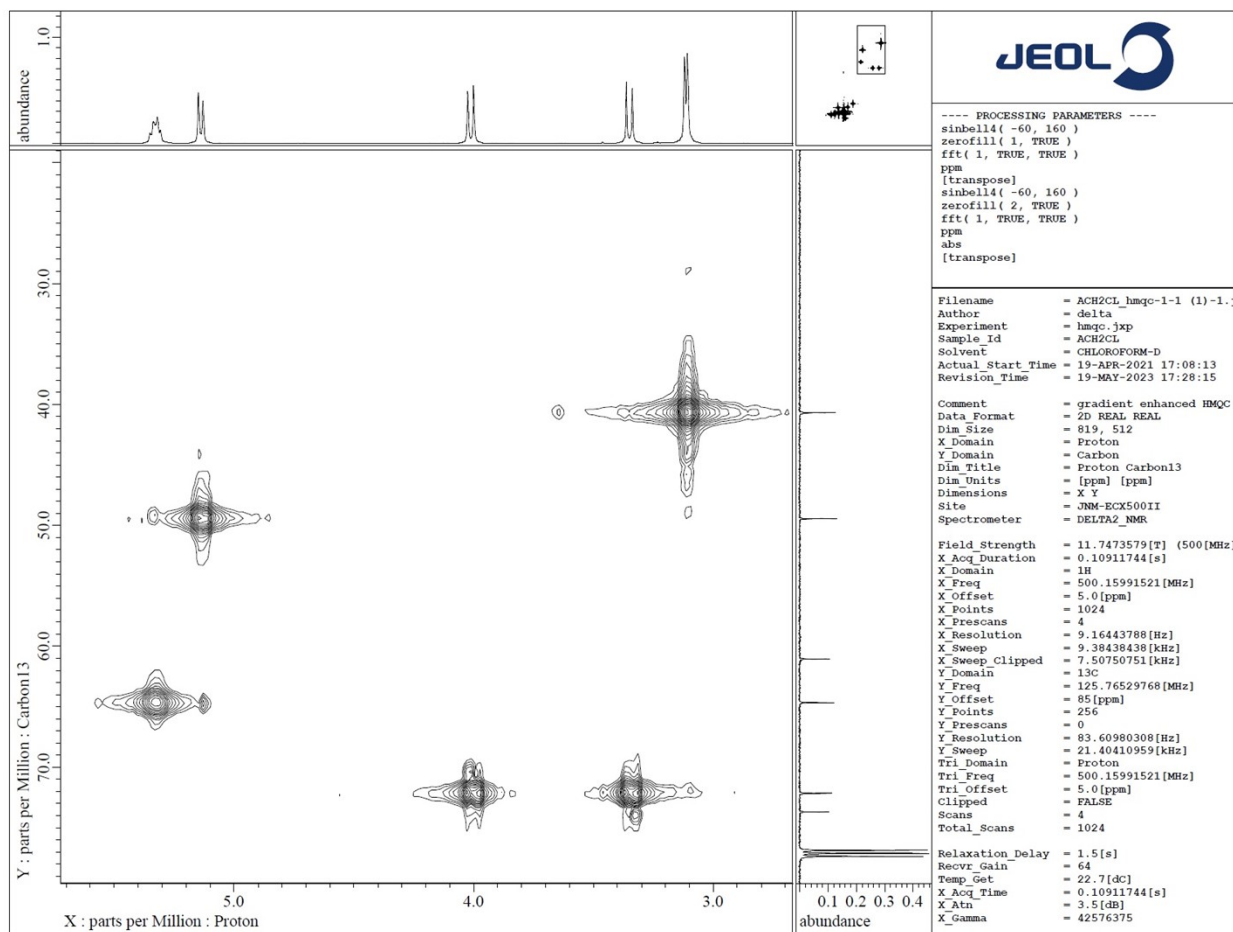

**Figure S5.** HMQC NMR spectrum of **5c**

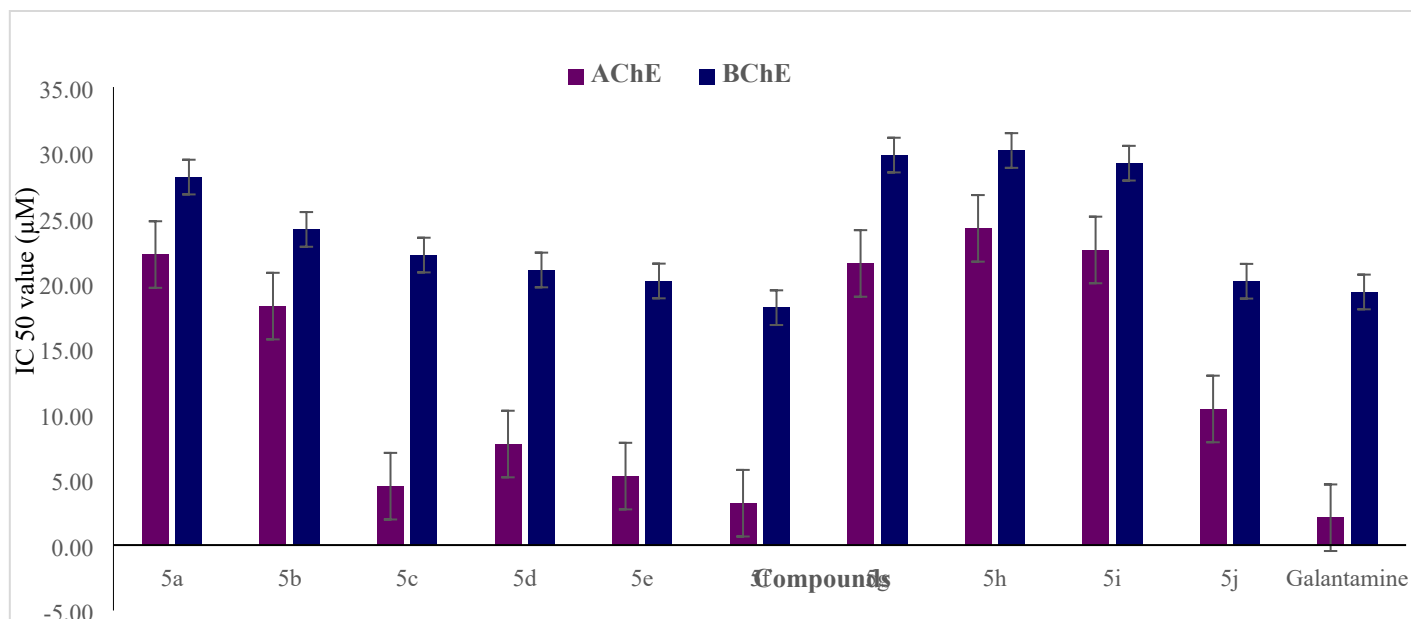

**Figure S6.** Cholinesterase inhibitory activity

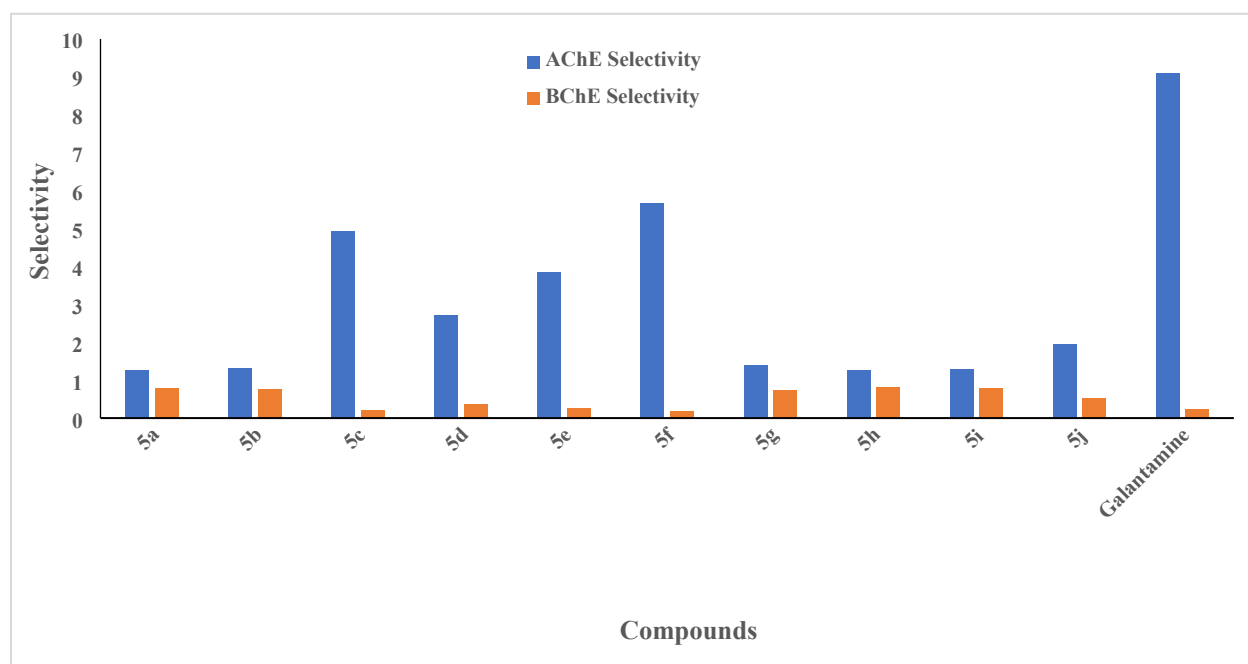

**Figure S7.** Cholinesterase selectivity

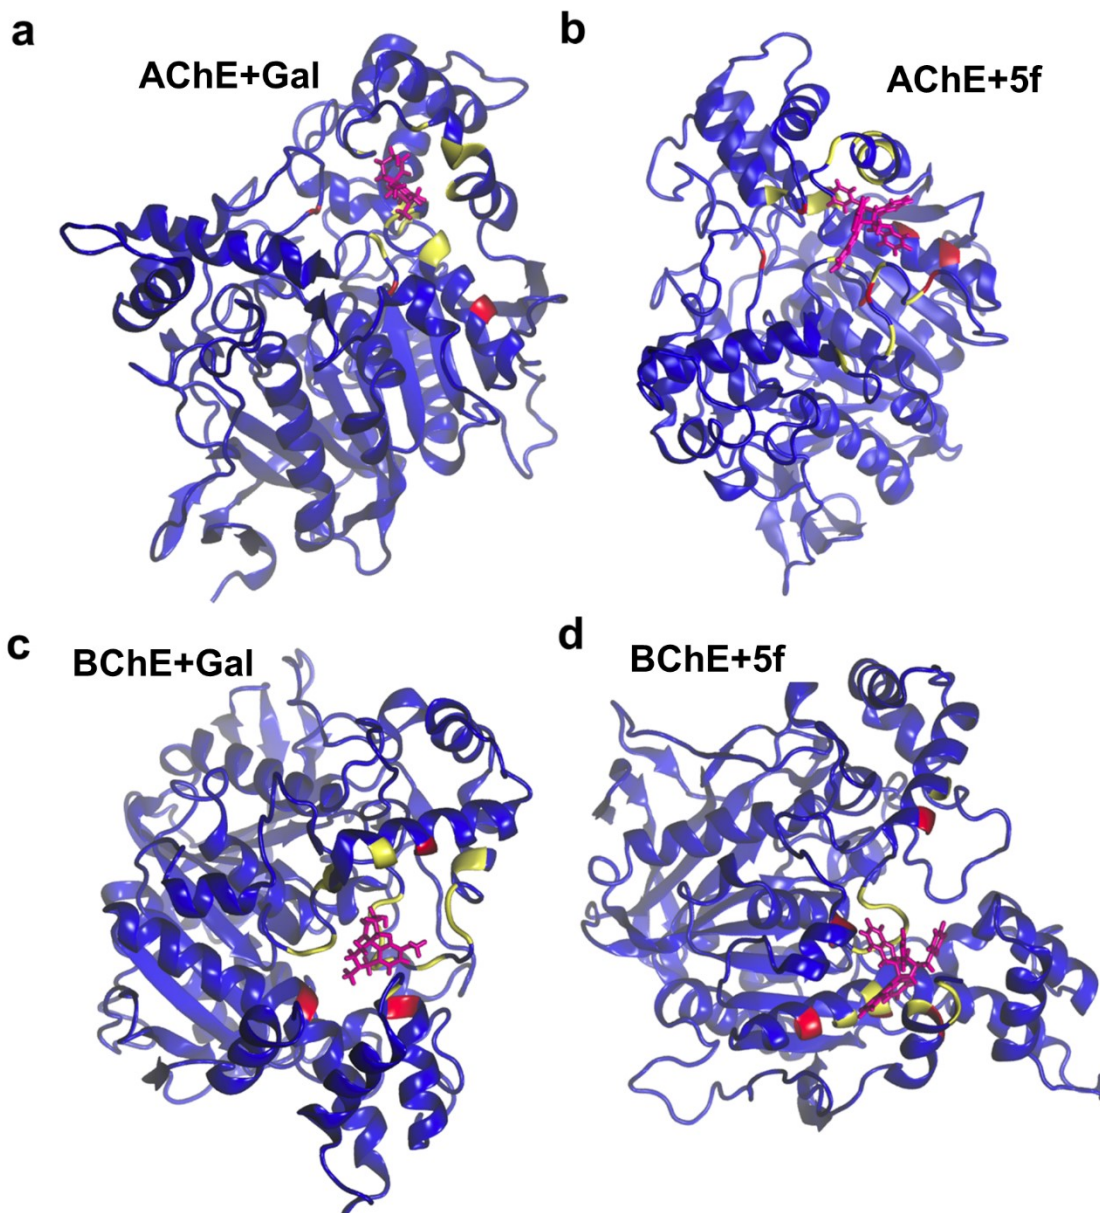

**Figure S8:** Representation of binding residues (negative/positive binding energy residues represented as Yellow/Red respectively) that are contributing to drug (represented as Magenta) binding with protein (represented as Blue) in (a) AChE+Gal, (b) AChE+5f, (c) BChE+Gal and (d) BChE+5f complexes. A smaller number of binding residues are observed at galantamine – AChE interface compared to other drug – protein complexes.

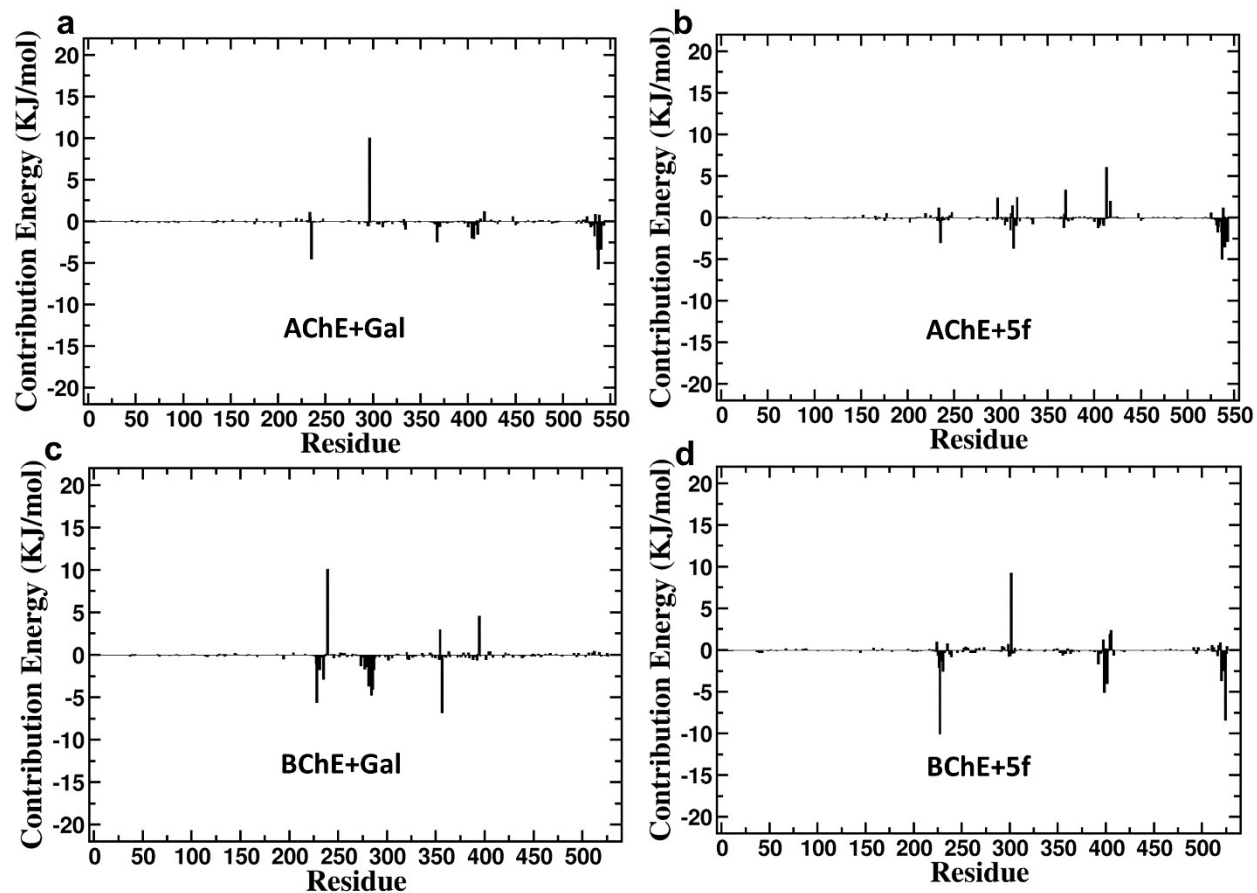

**Figure S9:** Binding energy profiles of (a) Gal+ AChE and (b) 5f+AChE, (c) Gal+BChE and (d) 5f+BChE complexes as a function of its residue number are obtained using MMPBSA calculations. The number of residues contributing to the protein – drug complex formation is computed to explain the differences in their binding energies.

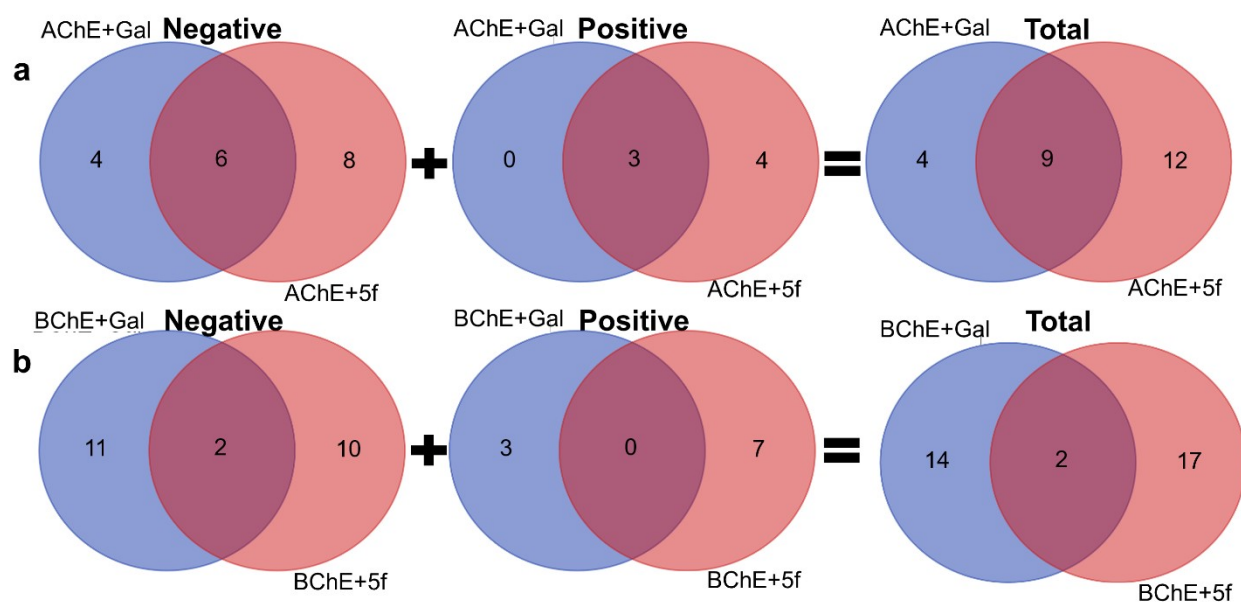

**Figure S10:** Venn diagrams of number of residues of proteins (a) AChE and (b) BChE that are contributing to protein – drug (Galantamine/**5f**) complex formation. It reveals that the number of residues that favor Galantamine/**5f** binding with the AChE are 10 & 14 respectively, while it changes to 13 & 12 for BChE+Gal and BChE+**5f** complexes. It is in good agreement with the van-der-Waal (vdW) energies observed in protein – ligand complexes.

**Table S1:** Swiss ADME results for 5f and galantamine.

| <b>Swiss ADME results</b>            |                                                        |                                |
|--------------------------------------|--------------------------------------------------------|--------------------------------|
|                                      | <b>5f</b>                                              | <b>Galantamine</b>             |
| <b>Pharmacokinetics</b>              |                                                        |                                |
| GI absorption                        | Low                                                    | High                           |
| BBB permeant                         | No                                                     | Yes                            |
| P -gp substrate                      | No                                                     | Yes                            |
| CYP1A2 inhibitor                     | Yes                                                    | No                             |
| CYP2C19 inhibitor                    | No                                                     | No                             |
| CYP2C9 inhibitor                     | No                                                     | No                             |
| CYP2D6 inhibitor                     | No                                                     | Yes                            |
| CYP3A4 inhibitor                     | No                                                     | No                             |
| Log K <sub>p</sub> (skin permeation) | -5.27 cm/s                                             | -6.75 cm/s                     |
| <b>Physicochemical Properties</b>    |                                                        |                                |
| Molecular weight                     | 589.66 g/mol                                           | 287.35 g/mol                   |
| Num. heavy atoms                     | 45                                                     | 21                             |
| Num. arom. heavy atoms               | 34                                                     | 6                              |
| Fraction Csp <sup>3</sup>            | 0.15                                                   | 0.53                           |
| Num. rotatable bonds                 | 3                                                      | 1                              |
| Num. H-bond acceptors                | 6                                                      | 4                              |
| Num. H-bond donors                   | 1                                                      | 1                              |
| Molar Refractivity                   | 174.46                                                 | 84.05                          |
| <b>Drug likeness</b>                 |                                                        |                                |
| Lipinski                             | No; 2 violations: MW>500, MLOGP>4.15                   | Yes; 0 violation               |
| Ghose                                | No; 4 violations: MW>480, WLOGP>5.6, MR>130, #atoms>70 | Yes                            |
| Veber                                | Yes                                                    | Yes                            |
| Egan                                 | No; 1 violation: WLOGP>5.88                            | Yes                            |
| Muegge                               | No; 2 violations: XLOGP3>5, #rings>7                   | Yes                            |
| Bioavailability                      | 0.17                                                   | 0.55                           |
| <b>Lipophilicity</b>                 |                                                        |                                |
| Log P <sub>0/w</sub> (iLOGP)         | 4.38                                                   | 2.66                           |
| Log P <sub>0/w</sub> (XLOGO3)        | 6.52                                                   | 1.84                           |
| Log P <sub>0/w</sub> (WLOGP)         | 7.18                                                   | 1.32                           |
| Log P <sub>0/w</sub> (MLOGP)         | 4.88                                                   | 1.74                           |
| Log P <sub>0/w</sub> (SILICOS-IT)    | 7.80                                                   | 2.03                           |
| Consensus Log P <sub>0/w</sub>       | 6.15                                                   | 1.92                           |
| <b>Water Solubility</b>              |                                                        |                                |
| Log S (ESOL)                         | -7.96                                                  | -2.93                          |
| Solubility                           | 6.40e-06 mg/ml; 1.08e-08 mol/l                         | 3.41e-01 mg/ml; 1.19e-03 mol/l |
| Class                                | Poorly soluble                                         | Soluble                        |
| Log S (Ali)                          | -7.66                                                  | -2.34                          |
| Solubility                           | 1.28e-05 mg/ml; 2.17e-08 mol/l                         | 1.31e+00 mg/ml; 4.56e-03 mol/l |
| Class                                | Poorly soluble                                         | Soluble                        |
| Log S (SILICOS-IT)                   | -14.64                                                 | -2.96                          |
| Solubility                           | 1.35e-12 mg/ml; 2.29e-15 mol/l                         | 3.17e-01 mg/ml; 1.10e-03 mol/l |
| Class                                | Insoluble                                              | Soluble                        |
